# Supplementary material for: The genes of the sulphoquinovose catabolism in Escherichia coli are also associated with a previously unknown pathway of lactose degradation
Source: PubMed Central journal article supplement (PMC5816610; doi:10.1038/s41598-018-21534-3), 2018-02-16
Supplement: 41598_2018_21534_MOESM1_ESM.pdf [file 41598_2018_21534_MOESM1_ESM.pdf]

**The genes of the sulphoquinovose catabolism in *Escherichia coli* are also associated with a previously unknown pathway of lactose degradation**

Anna Kaznadzey<sup>1</sup>, Pavel Shelyakin<sup>1,2</sup>, Evgeniya Belousova<sup>3</sup>, Aleksandra Eremina<sup>4</sup>, Uliana Shvyreva<sup>5</sup>, Darya Bykova<sup>3</sup>, Vera Emelianenko<sup>3</sup>, Anastasiya Korosteleva<sup>6</sup>, Maria Tutukina<sup>5,7,\*</sup>  
Mikhail S Gelfand<sup>1,3,7,8</sup>

1 – A. A. Kharkevich Institute for Information Transmission Problems, RAS, Bolshoy Karetny per. 19, Moscow, 127051, Russia

2 – N. I. Vavilov Institute of General Genetics, RAS, ul. Gubkina 3, Moscow, 119991, Russia

3 – M. V. Lomonosov Moscow State University, Vorobievsky Gory 1-73, Moscow, 119991, Russia

4 – The University of Edinburgh, Alexander Crum Brown Rd, Edinburgh, Scotland, EH9 3FF, UK

5 – Institute of Cell Biophysics, RAS, Institutskaya 3, Pushchino, 142290, Russia

6 – Novosibirsk State University, ul. Pirogova 2, Novosibirsk, 630090, Russia

7 – Center for Data-Intensive Biomedicine and Biotechnology, Skolkovo Institute of Science and Technology, Moscow, 143028, Russia

8 – Faculty of Computer Science, Higher School of Economics, Kochnovsky pr. 3, Moscow, 125319, Russia

\* Corresponding author. E-mail: [m.tutukina@skoltech.ru](mailto:m.tutukina@skoltech.ru)

Table S1. *Escherichia coli* strains and plasmids used in this study

| Strains              | Description                                                                         | Reference |
|----------------------|-------------------------------------------------------------------------------------|-----------|
| K-12 MG1655          | Wild type F- lambda- <i>ilvG- rfb-50 rph-1</i>                                      | 47        |
| M182                 | $\Delta lac$ derivative of K-12 MG1655                                              | 40        |
| MG1655 $\Delta yihW$ | $\Delta yihW$ derivative of K-12 MG1655                                             | This work |
| MG1655 $\Delta crp$  | $\Delta crp$ derivative of K-12 MG1655                                              | 48        |
| M182 $\Delta yihW$   | $\Delta yihW$ derivative of M182                                                    | This work |
| M182 $\Delta crp$    | $\Delta crp$ derivative of M182                                                     | 49        |
| BL21*(DE3)           | F- <i>ompT hsdSB (rB-mB-) gal dcm rne131</i> (DE3)                                  | 50        |
| <i>Plasmids</i>      |                                                                                     |           |
| pET_CRP              | Vector based on pET28b (Invitrogen) overproducing the CRP protein, Kan <sup>R</sup> | This work |

Table S2. Oligonucleotide primers used in this study.

| Primer name | Primer sequence (5'-3')       |
|-------------|-------------------------------|
| yihU/V_F    | CGTTCACATCAAAGACGCGA          |
| yihU/V_R    | GTCGGTAACCCTTCCACGTA          |
| yihV/W_F    | TCAACCGGCCTTCAAAGTTG          |
| yihV/W_R    | GCGATCAGCATGAGGAGTTG          |
| yihS/R_F    | AGCTGGATGCGGACAATAAG          |
| yihS/R_R    | GGCATCTCTTCGGGTTTGTG          |
| yihW_RT     | CCGTATTAACGACGCTGGAA          |
| yihW_PCR    | GCCGAGCGTGGGTATATGAA          |
| yihV_RT     | TCATCACCTACGCGACCAAT          |
| yihV_PCR    | TTCGTGTTGCTTGTGTAGGT          |
| yihU_RT     | GGAGTCGCACCTTTGTCTAC          |
| yihU_PCR    | CGCGTTTATCGGTTTAGGAC          |
| yihT_RT     | ATTGTTGATCTACCAGAATCG         |
| yihT_PCR    | CGAAGCCATGCGCATGATGT          |
| yihS_RT     | CCGTGATCAACCAACGAGTA          |
| yihS_PCR    | GGTTTTGGCTGGTTAGGCAA          |
| hns_RT      | ATTTAACGGCAGCAAGGCTATT        |
| hns_PCR     | GAAGTTGAAGAGCGCACTCG          |
| hns_Bgl_263 | AGGGAGATCTCGTAAACACAATA       |
| hns_Xba     | GTTGTCTAGAATTTTAAGTGCTTCG     |
| CRP_NdeI    | ACCGCATATGGTGCTTGGCAAACCGCAA  |
| CRP_Bpu1102 | CCACGCTGAGCGGATTAACGAGTGCCGTA |

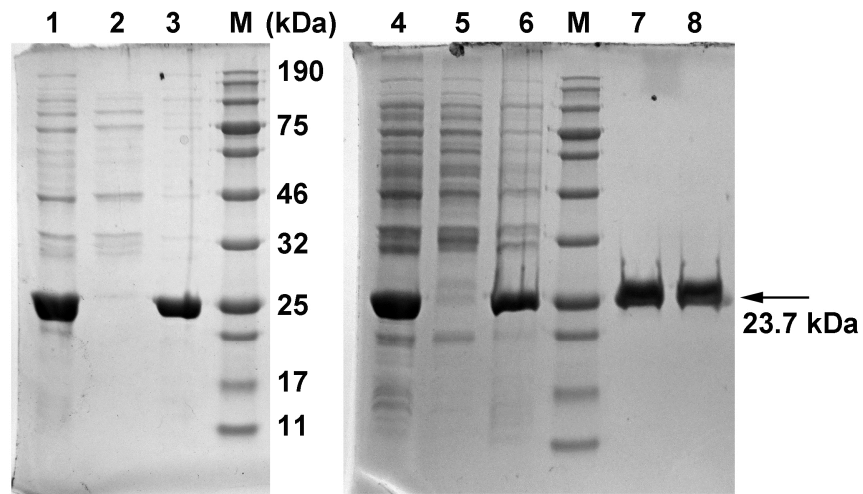

Fig. S1. CRP induction and purification steps. 1 and 4 – total lysate after 16h induction with 20 $\mu$ M IPTG; 2 – soluble fraction; 3 – insoluble fraction; 5 – flow-through after loading of the final lysate (shown on lane 6) onto a column with cAMP-agarose; 6 – cleared cell lysate after treatment with BugBuster reagent (Novagen) followed by sonication; 7 and 8 – pure CRP eluted with 5mM cAMP. Blue prestained protein ladder (11-190 kDa, New England Biolabs) was used as a standard.

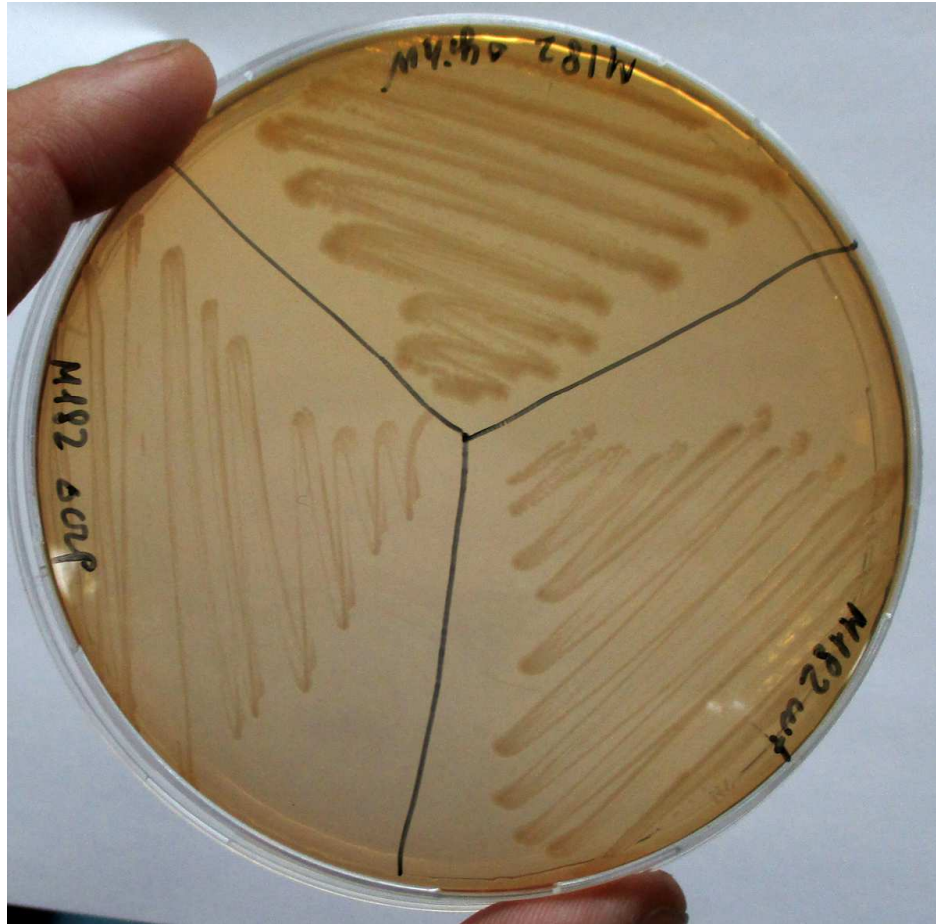

Fig. S2 Growth of the *Escherichia coli* M182 wild type strain, and its  $\Delta yihW$  and  $\Delta crp$  derivatives on MacConkey agar.

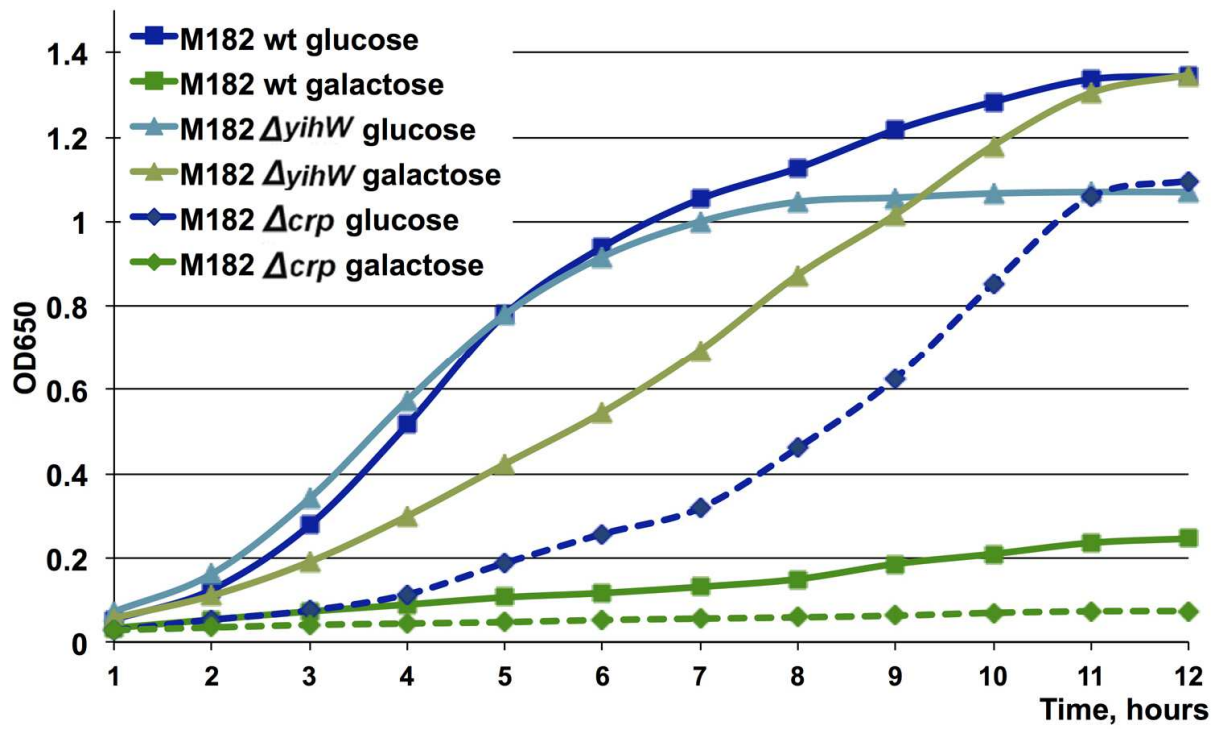

Fig. S3. Effects of *yihW* and *crp* deletions on growth in the presence of 0.2 % glucose or galactose. Squares: the parent strain; triangles: the *yihW* mutant. Dashed lines correspond to cultures with deleted *crp*.
